# Supplementary material for: Loss of flight promotes beetle diversification
Source: PubMed Central journal article supplement — Nat Commun. 2012 Jan 31;3:648–. doi: 10.1038/ncomms1659 (PMC3272566; doi:10.1038/ncomms1659), 2012-01-31
Supplement: ncomms1659-s1.pdf [file ncomms1659-s1.pdf]

## Supplementary Information: Loss of flight promotes beetle diversification

Hiroshi Ikeda, Masaaki Nishikawa and Teiji Sota

Supplementary Figure S1 | Sampling localities used for genetic analysis and estimation of distribution areas.

Supplementary Figure S2 | Relationship between the present habitat discontinuity and genetic differentiation of the *COI-II* gene.

Supplementary Figure S3 | Maximum likelihood tree of all *COI-II* haplotypes.

Supplementary Figure S4 | Results of the single-threshold model using the GMYC approach.

Supplementary Figure S5 | Maximum likelihood tree based on the *COI-II*, *16S*, *28S*, *Wg*, and *Pepck* genes.

Supplementary Table S1 | GenBank accession numbers of *COI-II* gene sequences used in this study.

Supplementary Table S2 | GenBank accession numbers of *Pepck* and *Wg* gene sequences used for AMOVA.

Supplementary Table S3 | The contribution of each environmental variable to the estimation of distribution areas.

Supplementary Table S4 | The data used in the meta-analysis of the relationship between flight ability and genetic differentiation in beetles.

Supplementary Methods

Supplementary References

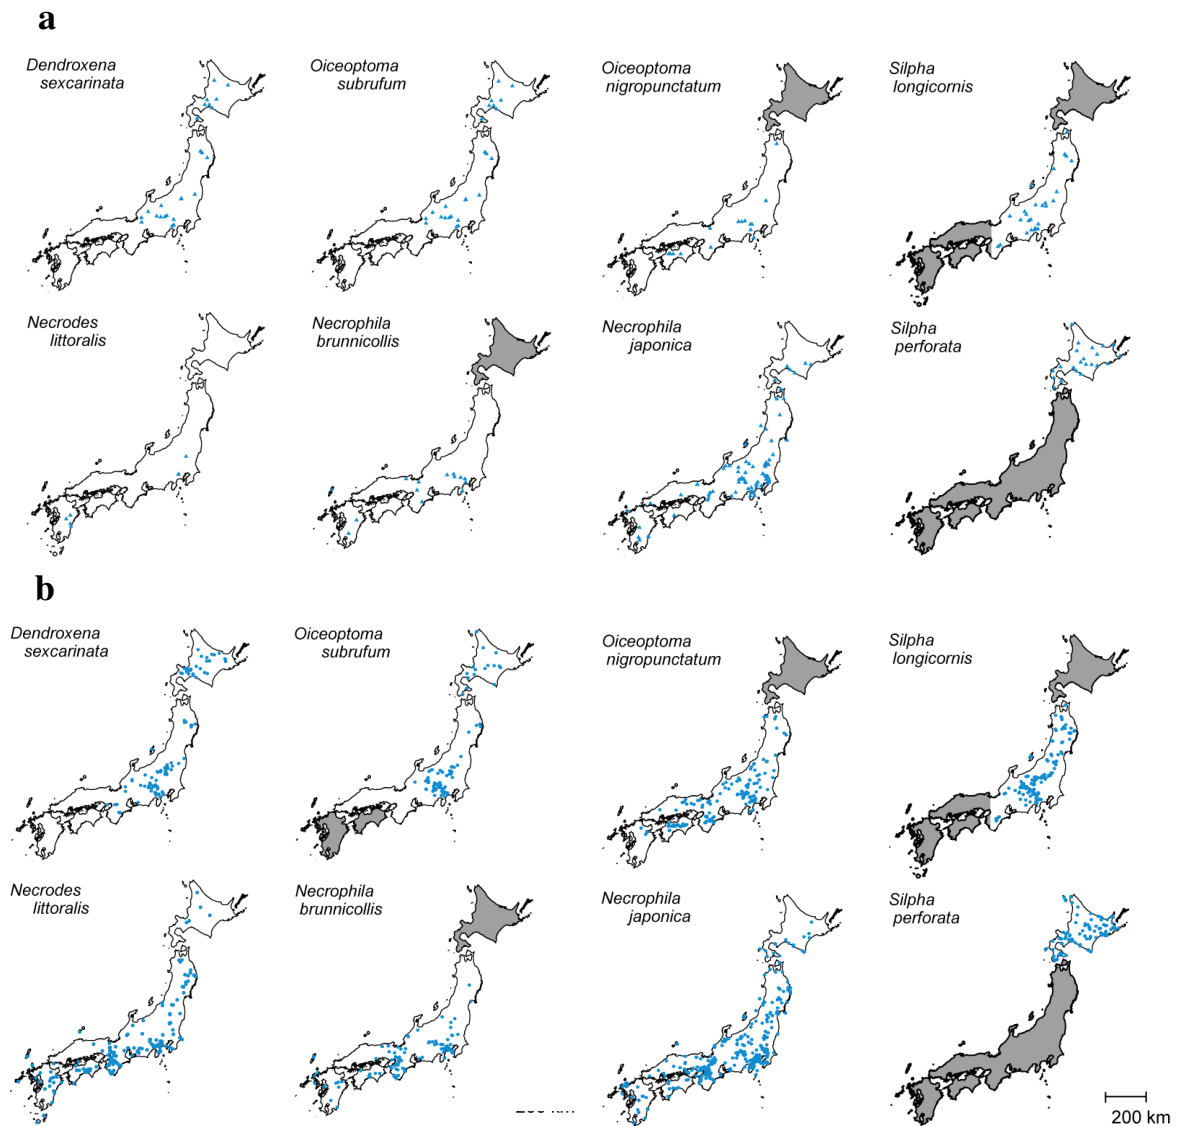

**Supplementary Figure S1 | Sampling localities used for genetic analysis and estimation of distribution areas. (a)** Sampling localities used for genetic analysis. Localities are shown in light blue circles. The areas in which the species do not occur are shown in light gray. **(b)** Sampling localities used for estimation of distribution areas. Localities are shown in light blue triangles.

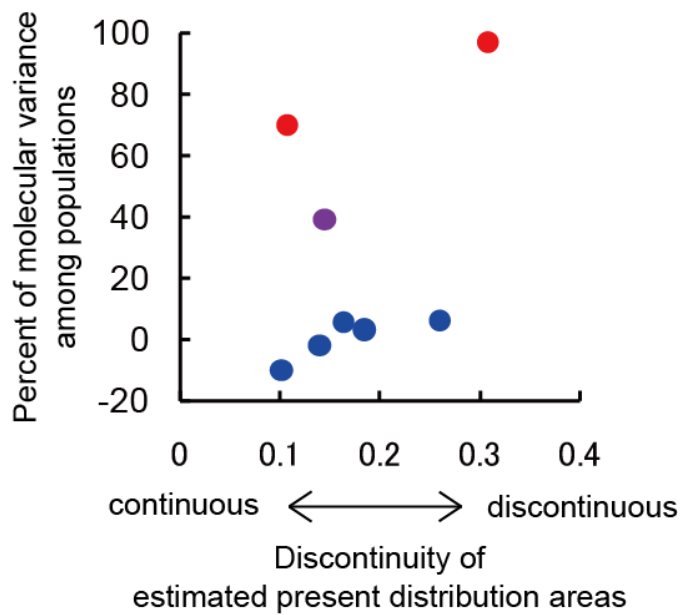

**Supplementary Figure S2 | Relationship between the present habitat discontinuity and the genetic differentiation of the *COI-II* gene.** The genetic differentiation is expressed as the proportion of molecular variance among populations in the analysis of molecular variances. Blue, red, and purple circles indicate flight-capable, flightless, and dimorphic species, respectively.

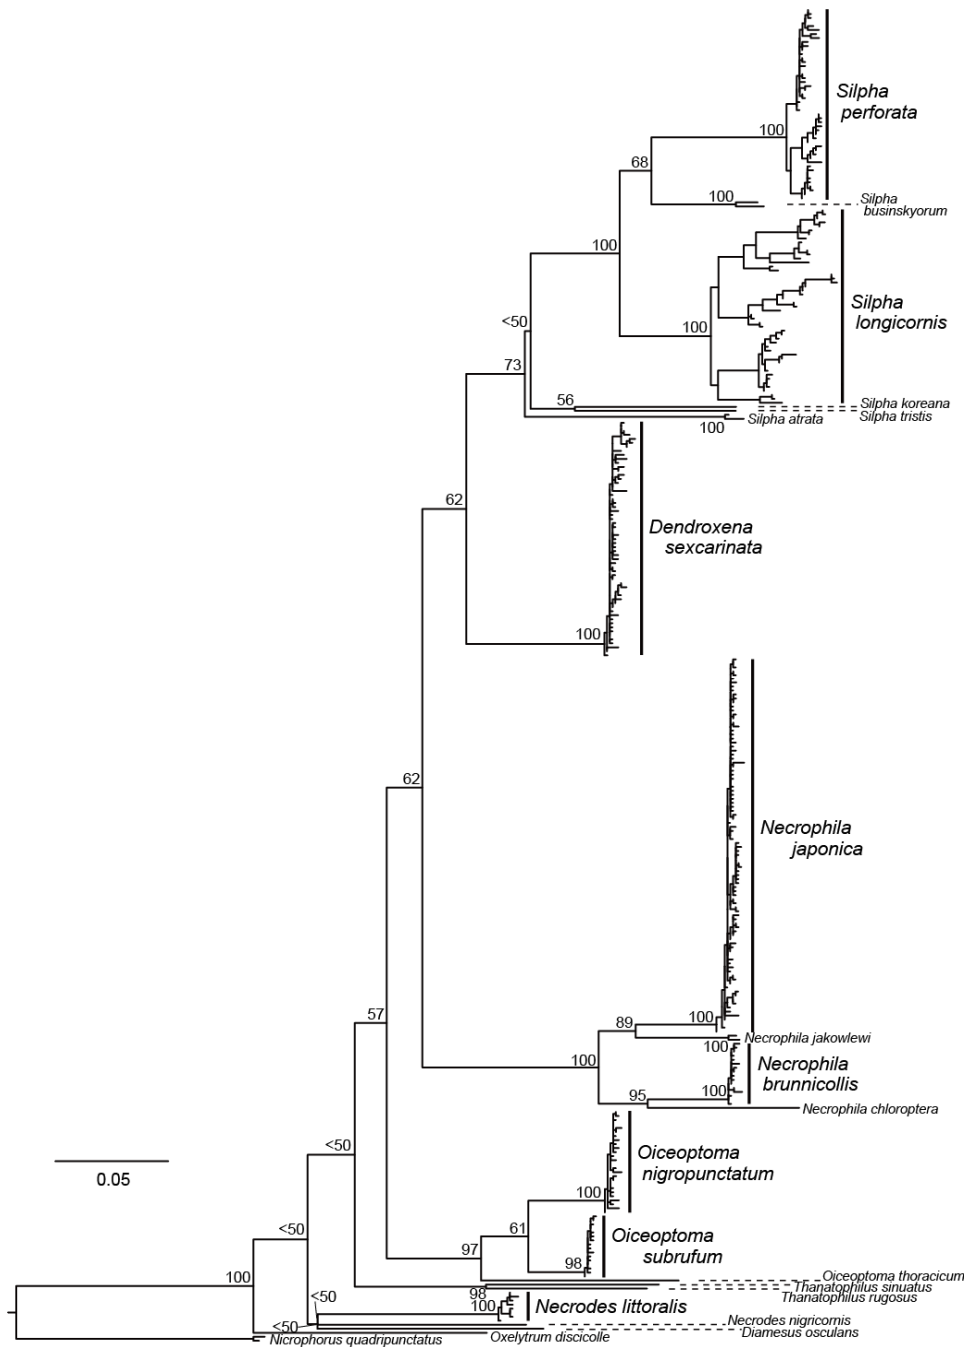

**Supplementary Figure S3 | Maximum likelihood (ML) tree of all *COI-II* haplotypes.**

Numbers on the branches for different species represent the ML bootstrap percentage. The scale bar is based on the number of substitutions per site.

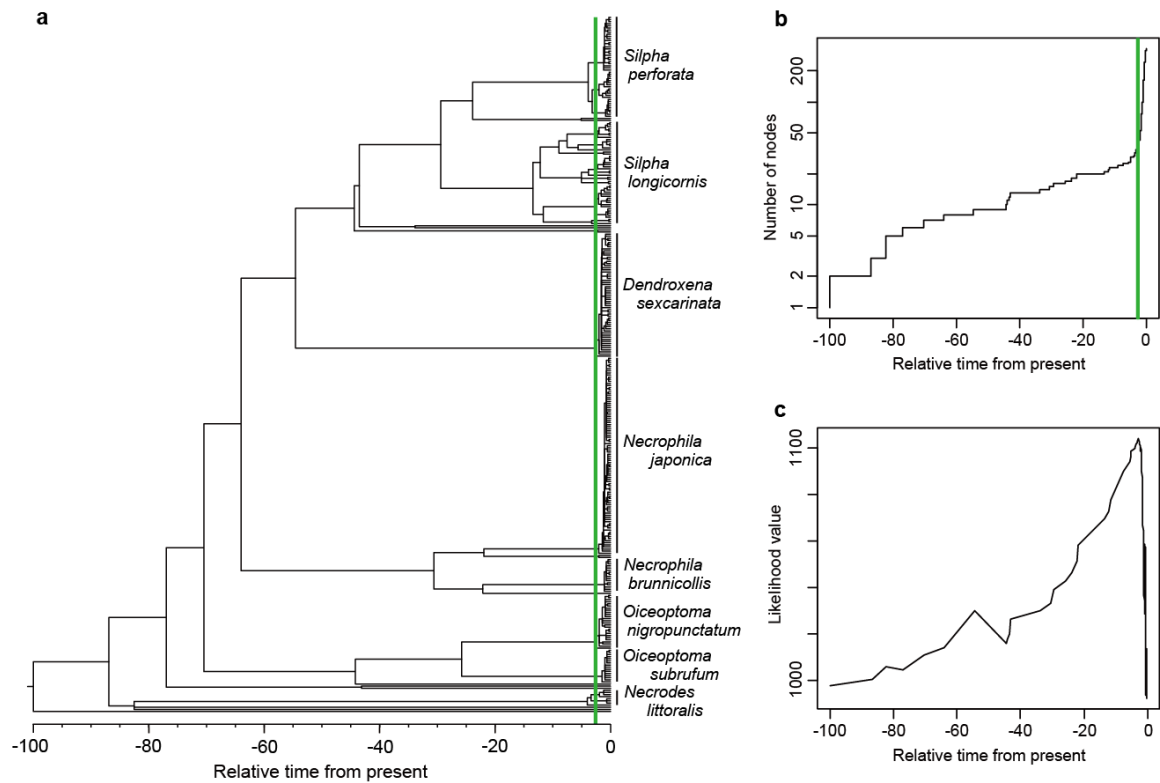

**Supplementary Figure S4 | Results of the single-threshold model using the GMYC**

**approach. (a)** Ultrametric tree transformed from the ML tree of all *COI-II* haplotypes. The time of the root node in Silphinae was arbitrarily set at 100. The threshold time estimated from the single-threshold model is shown by a green line (threshold time: 2.72). **(b)** Relationship between the relative time from the present and the number of nodes. The threshold time estimated from the single-threshold model is shown by a green line. **(c)** Relationship between the relative time from the present and the likelihood value of threshold time.

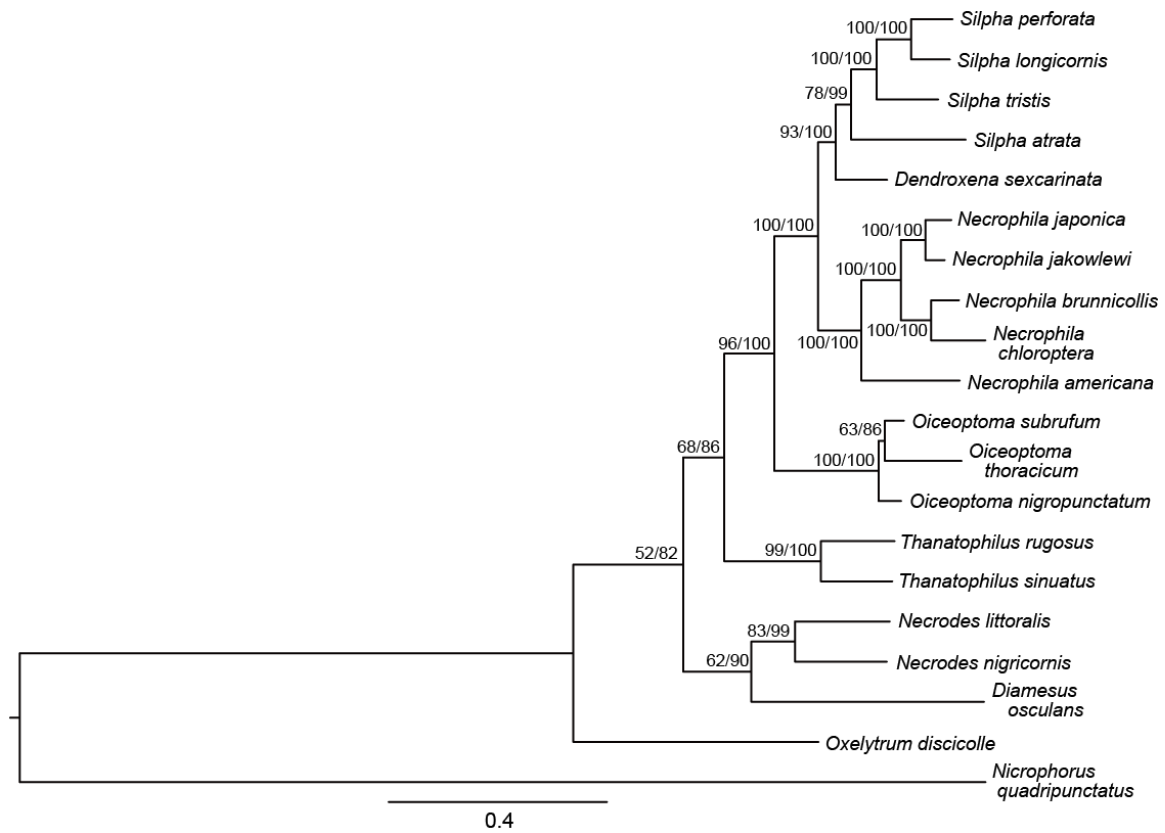

**Supplementary Figure S5 | Maximum likelihood (ML) tree based on the *COI-II*, *16S*, *28S*, *Wg*, and *Pepck* genes.** The values at the nodes represent the ML bootstrap percentage/Bayesian posterior probability. The scale bar is based on the number of substitutions per site.

**Supplementary Table S1 | GenBank accession numbers of the *COI-II* gene sequences used in this study.**

| Species                            | Accession number                               | Sample used for species tree |
|------------------------------------|------------------------------------------------|------------------------------|
| <i>Oxelytrum discicolle</i>        | AB606431                                       | AB606431                     |
| <i>Diamesus osculans</i>           | AB606432                                       | AB606432                     |
| <i>Necrodes littoralis</i>         | AB606438-AB606445                              | AB606442                     |
| <i>Necrodes nigricornis</i>        | AB606433                                       | AB606433                     |
| <i>Thanatophilus rugosus</i>       | AB606434                                       | AB606434                     |
| <i>Thanatophilus sinuatus</i>      | AB606435                                       | AB606435                     |
| <i>Oiceoptoma nigropunctatum</i>   | AB606446-AB606471                              | AB606447                     |
| <i>Oiceoptoma subrufum</i>         | AB606472-AB606487                              | AB606472                     |
| <i>Oiceoptoma thoracicum</i>       | AB606436                                       | AB606436                     |
| <i>Necrophila chloroptera</i>      | AB606437                                       | AB606437                     |
| <i>Necrophila brunnicollis</i>     | AB376113, AB606488-AB606502                    | AB606488                     |
| <i>Necrophila jakowlewi</i>        | AB606503, AB606504                             | AB606504                     |
| <i>Necrophila japonica</i>         | AB376112, AB376114, AB606505-AB606596          | AB606575                     |
| <i>Dendroxena sexcarinata</i>      | AB376110, AB376117, AB606597-AB606653          | AB606612                     |
| <i>Silpha atrata</i>               | AB376111, AB606654                             | AB376111                     |
| <i>Silpha tristis</i>              | AB376109                                       | AB376109                     |
| <i>Silpha perforata</i>            | AB376167-AB376209, AB438997, AB606655-AB606658 | AB376185                     |
| <i>Silpha longicornis</i>          | AB376119-AB376166, AB606659                    | AB376161                     |
| <i>Silpha koreana</i>              | AB376116                                       | —                            |
| <i>Silpha businskyorum</i>         | AB376104, AB376105                             | —                            |
| <i>Nicrophorus quadripunctatus</i> | AB606660, AB606661                             | AB606661                     |

**Supplementary Table S2 | GenBank accession numbers of the *PepCK* and *Wg* gene sequences used for AMOVA.**

| Species name                     | Accession number                         |                                          |
|----------------------------------|------------------------------------------|------------------------------------------|
|                                  | <i>PepCK</i>                             | <i>Wg</i>                                |
| <i>Necrodes littoralis</i>       | AB285599, AB668649-AB668656              | AB285631, AB668811-AB668813              |
| <i>Oiceoptoma nigropunctatum</i> | AB285603, AB668657-AB668689              | AB285635, AB668814-AB668848              |
| <i>Oiceoptoma subrufum</i>       | AB285600, AB668602-AB668608              | AB285632, AB668613-AB668620              |
| <i>Necrophila brunnicollis</i>   | AB285613, AB668599-AB668601              | AB285645, AB668609-AB668612              |
| <i>Necrophila japonica</i>       | AB285602, AB668690-AB668748              | AB285634, AB668849-AB668881              |
| <i>Dendroxena sexcarinata</i>    | AB285598, AB668621-AB668648              | AB285630, AB668772-AB668810              |
| <i>Silpha perforata</i>          | AB285597, AB668749-AB668754              | AB285629, AB668882-AB668904              |
| <i>Silpha longicornis</i>        | AB285601, AB285608,<br>AB668755-AB668771 | AB285633, AB285640,<br>AB668905-AB668939 |



**Supplementary Table S3 | The contribution of each environmental variable to the estimated distribution areas.** The area under the receiver operating curve (AUC) values are also shown.

| Species                  | No. of sites | AUC values | Proportion of contribution (%) |                         |                                      |                                   |                                      |                                   |                           |                           |                               |                                |                    |
|--------------------------|--------------|------------|--------------------------------|-------------------------|--------------------------------------|-----------------------------------|--------------------------------------|-----------------------------------|---------------------------|---------------------------|-------------------------------|--------------------------------|--------------------|
|                          |              |            | Annual mean temperature        | Temperature seasonality | Minimum temperature of coldest month | Mean temperature of coldest month | Maximum temperature of warmest month | Mean temperature of warmest month | Annual mean precipitation | Precipitation seasonality | Precipitation of driest month | Precipitation of wettest month | Maximum snow depth |
| <i>D. sexcarinata</i>    | 105          | 0.80       | 0.0                            | 2.0                     | 9.0                                  | 0.9                               | 63.5                                 | 12.1                              | 0.5                       | 4.3                       | 3.1                           | 4.2                            | 0.4                |
| <i>O. subrufum</i>       | 97           | 0.83       | 0.0                            | 2.4                     | 0.3                                  | 0.0                               | 57.0                                 | 0.9                               | 2.0                       | 1.5                       | 1.6                           | 18.5                           | 15.7               |
| <i>O. nigropunctatum</i> | 159          | 0.80       | 4.7                            | 9.5                     | 11.1                                 | 7.5                               | 12.8                                 | 9.2                               | 17.0                      | 3.5                       | 0.7                           | 7.3                            | 16.8               |
| <i>N. littoralis</i>     | 193          | 0.75       | 2.7                            | 20.0                    | 16.4                                 | 2.2                               | 0.4                                  | 2.8                               | 17.5                      | 6.3                       | 3.3                           | 6.2                            | 22.1               |
| <i>N. brunnicollis</i>   | 115          | 0.77       | 2.8                            | 10.4                    | 2.2                                  | 1.9                               | 5.9                                  | 0.1                               | 2.3                       | 5.3                       | 3.4                           | 17.2                           | 48.5               |
| <i>N. japonica</i>       | 379          | 0.77       | 10.5                           | 14.1                    | 2.4                                  | 16.3                              | 19.2                                 | 2.3                               | 4.7                       | 9.6                       | 2.2                           | 9.6                            | 9.1                |
| <i>S. longicornis</i>    | 169          | 0.92       | 18.7                           | 15.7                    | 1.5                                  | 9.4                               | 18.9                                 | 8.3                               | 1.6                       | 6.1                       | 1.2                           | 15.2                           | 3.4                |
| <i>S. perforata</i>      | 114          | 0.93       | 3.0                            | 5.3                     | 0.4                                  | 1.2                               | 67.1                                 | 0.9                               | 8.0                       | 1.7                       | 1.2                           | 7.1                            | 4.0                |

**Supplementary Table S4 | The data used in the meta-analysis of the relationship between flight ability and genetic differentiation in beetles.**

| Family<br>Species                                                                              | Gene          | Flight ability | Percent of molecular<br>variance among<br>populations | Sampling<br>range (km) | Study region     |
|------------------------------------------------------------------------------------------------|---------------|----------------|-------------------------------------------------------|------------------------|------------------|
| Carabidae                                                                                      |               |                |                                                       |                        |                  |
| <i>Coptolabrus smaragdinus</i> <sup>51</sup>                                                   | <i>COI</i>    | flightless     | 91.70                                                 | 300                    | South Korea      |
| <i>Coptolabrus jankowski</i> <sup>51</sup>                                                     | <i>COI</i>    | flightless     | 75.70                                                 | 300                    | South Korea      |
| <i>Leptocarabus koreanus</i> <sup>52</sup>                                                     | <i>COI</i>    | flightless     | 47.64                                                 | 300                    | South Korea      |
| <i>Leptocarabus seishinensis</i> <sup>52</sup>                                                 | <i>COI</i>    | flightless     | 79.16                                                 | 300                    | South Korea      |
| <i>Leptocarabus semiopacus</i> <sup>52</sup>                                                   | <i>COI</i>    | flightless     | 37.73                                                 | 300                    | South Korea      |
| Cerambycidae                                                                                   |               |                |                                                       |                        |                  |
| <i>Acrocinus longimanus</i> <sup>53</sup>                                                      | <i>COI</i>    | flight-capable | 54.30                                                 | 2400                   | Panama, Trinidad |
| <i>Semanotus japonicus</i> <sup>54</sup>                                                       | <i>COI-II</i> | flight-capable | 43.47                                                 | 1000                   | Japan            |
| Chrysomelidae                                                                                  |               |                |                                                       |                        |                  |
| <i>Plateumaris constricticollis</i> <sup>55</sup>                                              | <i>COI</i>    | flight-capable | 98.00                                                 | 1400                   | Japan            |
| <i>Plateumaris sericea</i> <sup>55</sup>                                                       | <i>COI</i>    | flight-capable | 90.00                                                 | 1600                   | Japan            |
| <i>Plateumaris shirahatai</i> <sup>55</sup>                                                    | <i>COI</i>    | flight-capable | 97.00                                                 | 1200                   | Japan            |
| <i>Plateumaris weisei</i> <sup>55</sup>                                                        | <i>COI</i>    | flight-capable | 88.00                                                 | 300                    | Japan            |
| Coccinellidae                                                                                  |               |                |                                                       |                        |                  |
| <i>Henosepilachna pustulosa</i> , <i>H. niponica</i> and<br><i>H. yasutomii</i> <sup>56*</sup> | <i>COI</i>    | flight-capable | 64.00                                                 | 300, 1000,<br>700      | Japan            |
| Curculionidae                                                                                  |               |                |                                                       |                        |                  |
| <i>Curculio camelliae</i> <sup>57</sup>                                                        | <i>COI</i>    | flight-capable | 76.40                                                 | 1100                   | Japan            |
| <i>Dendroctonus pseudotsugae</i> <sup>58</sup>                                                 | <i>COI</i>    | flight-capable | 19.84                                                 | 3300                   | America, Mexico  |
| <i>Dendroctonus ponderosae</i> <sup>59</sup>                                                   | <i>COI-II</i> | flight-capable | 35.04                                                 | 2300                   | North America    |
| <i>Porthetes hispidus</i> <sup>60</sup>                                                        | <i>COI</i>    | flight-capable | 16.00                                                 | 200                    | South Africa     |

|                                                |                 |                |       |      |                     |
|------------------------------------------------|-----------------|----------------|-------|------|---------------------|
| <i>Tomicus destruens</i> <sup>61</sup>         | <i>COI-II</i>   | flight-capable | 17.68 | 900  | France              |
| <i>Tomicus destruens</i> <sup>62</sup>         | <i>COI-II</i>   | flight-capable | 65.04 | 4000 | Mediterranean basin |
| <i>Tomicus piniperda</i> <sup>61</sup>         | <i>COI-II</i>   | flight-capable | 13.92 | 800  | France              |
| <i>Xylosandrus crassiusculus</i> <sup>63</sup> | <i>COI</i>      | polymorphic    | 90.33 | 2600 | Japan               |
| <i>Xylosandrus germanus</i> <sup>64</sup>      | <i>COI</i>      | flight-capable | 69.59 | 1600 | Japan               |
| <i>Polydrusus inustus</i> <sup>65</sup>        | <i>COII-NDI</i> | flightless     | 77.20 | 700  | central Europe      |
| <i>Centricnemus leucogrammus</i> <sup>65</sup> | <i>COII-NDI</i> | flightless     | 75.50 | 800  | central Europe      |
| Dytiscidae                                     |                 |                |       |      |                     |
| <i>Nebrioporus ceresyi</i> <sup>66</sup>       | <i>COI</i>      | flight-capable | 78.22 | 3800 | Mediterranean basin |
| <i>Paroster macrosturtensis</i> <sup>67</sup>  | <i>COI</i>      | flightless     | 55.70 | 3    | Australia           |
| <i>Paroster microsturtensis</i> <sup>67</sup>  | <i>COI</i>      | flightless     | 70.00 | 3    | Australia           |
| <i>Paroster mesosturtensis</i> <sup>67</sup>   | <i>COI</i>      | flightless     | 40.60 | 3    | Australia           |
| Histeridae                                     |                 |                |       |      |                     |
| <i>Hypocaccus lucidulus</i> <sup>68</sup>      | <i>COI</i>      | flight-capable | 10.00 | 400  | California          |
| Hydraenidae                                    |                 |                |       |      |                     |
| <i>Ochthebius glaber</i> <sup>66</sup>         | <i>COI</i>      | flight-capable | 89.34 | 500  | Mediterranean basin |
| <i>Ochthebius notabilis</i> <sup>66</sup>      | <i>COI</i>      | flight-capable | 62.51 | 1100 | Mediterranean basin |
| Hydrophilidae                                  |                 |                |       |      |                     |
| <i>Cercyon fimbriatus</i> <sup>68</sup>        | <i>COI</i>      | flight-capable | 1.00  | 600  | California          |
| Leiiodidae                                     |                 |                |       |      |                     |
| <i>Agryrtodes labralis</i> <sup>69</sup>       | <i>COI</i>      | flight-capable | 34.59 | 800  | New Zealand         |
| Lucanidae                                      |                 |                |       |      |                     |
| <i>Lucanus formosanus</i> <sup>70</sup>        | <i>COI</i>      | flight-capable | -0.30 | 300  | Taiwan              |
| Pythidae                                       |                 |                |       |      |                     |
| <i>Pytho abieticola</i> <sup>71</sup>          | <i>COI</i>      | flight-capable | 61.23 | 6000 | Eurasia             |

|                                                                           |             |                |       |          |                    |
|---------------------------------------------------------------------------|-------------|----------------|-------|----------|--------------------|
| <i>Pytho depressus</i> <sup>71</sup>                                      | <i>COI</i>  | flight-capable | 42.33 | 6000     | Eurasia            |
| <i>Pytho kolwensis</i> <sup>71</sup>                                      | <i>COI</i>  | flight-capable | 48.82 | 6000     | Eurasia            |
| Scarabaeidae                                                              |             |                |       |          |                    |
| <i>Antitrogus parvulus</i> <sup>72</sup>                                  | <i>COII</i> | flight-capable | 70.80 | 50       | Australia          |
| <i>Temnoplectron reyi</i> and <i>T. politulum</i> <sup>73*</sup>          | <i>COI</i>  | flight-capable | 36.86 | 100, 200 | Australia          |
| <i>Temnoplectron subvolitans</i> and <i>T. aeneopiceum</i> <sup>73*</sup> | <i>COI</i>  | polymorphic    | 73.80 | 100, 200 | Australia          |
| Staphylinidae                                                             |             |                |       |          |                    |
| <i>Sepedophilus castaneus</i> <sup>74</sup>                               | <i>COI</i>  | flightless     | 86.47 | 500      | California         |
| Tenebrionidae                                                             |             |                |       |          |                    |
| <i>Coelus ciliatus</i> <sup>75</sup>                                      | <i>COI</i>  | flightless     | 90.00 | 800      | California         |
| <i>Dichomma dardanum</i> <sup>27</sup>                                    | <i>COI</i>  | flightless     | 94.00 | 400      | Aegean archipelago |
| <i>Eutagenia</i> sp. 'sand' <sup>27</sup>                                 | <i>COI</i>  | flightless     | 73.00 | 300      | Aegean archipelago |
| <i>Eutagenia</i> sp. 'soil' <sup>27</sup>                                 | <i>COI</i>  | flightless     | 94.00 | 300      | Aegean archipelago |
| <i>Micrositus orbicularis</i> <sup>27</sup>                               | <i>COI</i>  | flightless     | 86.00 | 200      | Aegean archipelago |
| <i>Opatroides punctulatus</i> <sup>27</sup>                               | <i>COI</i>  | flight-capable | 61.00 | 300      | Aegean archipelago |
| <i>Pimelia sparsa</i> <sup>76</sup>                                       | <i>COII</i> | flightless     | 41.80 | 50       | Gran Canaria       |
| <i>Zophosis punctata</i> <sup>27</sup>                                    | <i>COI</i>  | flightless     | 88.00 | 600      | Aegean archipelago |

\*Two or three species were combined in the AMOVA in these references. Therefore, we removed the molecular variance among species and recalculated the proportion of variance among populations within combined species for our meta-analysis.

## Supplementary Methods

### *Sampling*

We collected eight species of Silphinae (*Dendroxena sexcarinata*, *Oiceoptoma subrufum*, *Oiceoptoma nigropunctatum*, *Necrodes littoralis*, *Necrophila brunnicollis*, *Necrophila japonica*, *Silpha perforata*, and *Silpha longicornis*) over a wide geographical area in the Japanese archipelago, namely Hokkaido, Honshu, Shikoku, Kyushu, and their adjacent islands (Supplementary Figure S1). The genus *Silpha* is totally wingless, and the above two species colonized Japan via landbridges during the Pleistocene<sup>18</sup>. Furthermore, 12 silphine species were included in the phylogenetic analysis of Silphinae: *Oxelytrum discicolle*, *Diamesus osculans*, *Necrodes nigricornis*, *Thanatophilus rugosus*, *Thanatophilus sinuatus*, *Oiceoptoma thoracicum*, *Necrophila chloroptera*, *Necrophila jakowlewi*, *Silpha atrata*, *Silpha tristis*, *Silpha koreana*, and *Silpha businskyorum*. *Nicrophorus quadripunctatus*, which is in the sister subfamily Nicrophorinae, was used as the outgroup. All specimens were identified by HI and MN. Taxonomic treatments followed references<sup>48,77,78</sup>. Specimens used for DNA analyses are all preserved as vouchers in Department of Entomology, Forestry and Forest Products Institute, Tsukuba, Japan, and to be deposited in the Kyoto University Museum.

### *Sequencing*

Methods for DNA sequencing were identical to those in previous papers<sup>16,18</sup>. The following primers were used for PCR amplification and direct sequencing: mitochondrial *COI-II* gene (842 bp): COS2183N (forward), 5'-CAR CAY YTA TTY TGR TTY TTY GG-3'<sup>79</sup>;

C1-J-2195 (forward), 5'-TTG ATT TTT TGG TCA TCC AGA AGT-3'<sup>80</sup>; 1J2441 (forward), 5'-CCA ACA GGA ATT AAA ATT TTT AGA TGA TTA GC-3'<sup>80</sup>; COA3107S (reverse), 5'-TCY ATY ARA GGK GAR GCW CTR TCT TG-3'<sup>18</sup>; COA3186E (reverse), 5'-ATT AAG TAT CCG ACT AAA ACA G-3'<sup>50</sup>; COA3374 (reverse), 5'-TAT CAT TGA TGX CCA ATA GTT TT-3'<sup>18</sup>; 2N3661 (reverse), 5'-CCA CAA ATT TCT GAA CAT TGA CCA-3'<sup>80</sup>; phosphoenolpyruvate carboxykinase gene (*PepCK*; 398 bp): Peps (forward), 5'-GGA GAT GAT ATY GCT TGG ATG-3'<sup>16</sup>; Pepa (reverse), 5'-GCW GCA GCR GTA GCT TCA CT-3'<sup>16</sup>; *wingless* gene (*Wg*; 386 bp): LEPWG1 (forward), 5'-GAR TGY AAR TGY CAY GGY ATG TCT GG-3'<sup>81</sup>; ModLEPWG2 (reverse), 5'-ACT ICG CAR CAC CAR TGG AAT GTR CA-3'<sup>81</sup>; Wgsils (forward), 5'-TGG ATG CGT TTR CCA CCR TT-3'<sup>16</sup>; Wgsila (reverse), 5'-TTG CAC CGY TCG ACG ACG AC-3'<sup>16</sup>; WgsilF2 (forward), 5'-AGT GTC ATG GTA TGT CTG GCT CGT GTA CAG-3' (this study); WgsilR2 (reverse), 5'-CGT TCG ACG ACG ACC ACT TCT TGT GT-3' (this study). Data generated in previous papers<sup>16, 18</sup> were also used.

#### *Estimated distribution areas*

Species distributions in the Japanese archipelago were estimated using the program Maxent ver. 3.2.19<sup>33</sup>. We obtained 11 environmental variables from the 1-km-mesh meteorological data of the area for 1971–2000<sup>82</sup>: annual mean temperature, temperature seasonality (coefficients of the variation in the monthly mean temperatures), minimum temperature of the coldest month, mean temperature of the coldest month, maximum temperature of the warmest month, mean temperature of the warmest month, annual precipitation, precipitation

in the driest month, precipitation in the wettest month, precipitation seasonality (coefficients of the variation in monthly precipitations), and maximum snow depth. The data associated with the presence of species after the 1970s were constructed based on specimens deposited at the Osaka Museum of Natural History and Wakayama City Museum, literature (Supplementary References), and unpublished data by HI and MN. An index of model performance, the area under the receiver operating curve (AUC), ranged from 0.75 to 0.93 for each species (Supplementary Table S3). AUC uses values between 0 and 1, where scores closer to 1 indicate a better performance of the model. Generally, models with AUC values greater than 0.75 are considered appropriate<sup>83</sup>.

Species distributions during the Last Glacial Maximum (LGM; 20,000 ya) were also estimated based on previous paleoclimatic data<sup>21</sup>. The temperature during the LGM was assumed to be 11°C lower than the present temperature and the area was assumed to have experienced 1100/2100 times more precipitation than at present. The maximum snow depth during the LGM was estimated from temperature and precipitation using the following formula<sup>84-86</sup>:

$$\text{Snow depth in a month} = \text{Precipitation for the month} \times (1 - P_{\text{rain}})/\rho + \text{Snow depth of the previous month} - \text{Monthly snow melt},$$

where  $P_{\text{rain}}$  is the proportion of rain in the total precipitation and  $\rho$  is the snow density.  $P_{\text{rain}}$  was determined using the monthly mean temperature ( $T$ ), the threshold temperature where 50% snowfall occurs ( $T_T$ ), and the temperature range at which both solid and liquid

precipitation occur ( $T_R$ ):

$$P_{\text{rain}} = 5 \times [(T - T_T)/(1.4 \times T_R)]^3 + 6.76 \times [(T - T_T)/(1.4 \times T_R)]^2 + 3.19 \times [(T - T_T)/(1.4 \times T_R)] + 0.5 \text{ if } T \leq T_T \text{ and } P_{\text{rain}} \geq 0;$$
$$P_{\text{rain}} = 5 \times [(T - T_T)/(1.4 \times T_R)]^3 - 6.76 \times [(T - T_T)/(1.4 \times T_R)]^2 + 3.19 \times [(T - T_T)/(1.4 \times T_R)] + 0.5 \text{ if } T \geq T_T \text{ and } P_{\text{rain}} \leq 0.$$

Monthly snow melt was determined as the daily snow melt  $\times$  30, where

Daily snow melt = 1 if  $T$  ( $^{\circ}\text{C}$ )  $<$  0;

Daily snow melt =  $2 \times T^{1.44} + 1$  if  $T$  ( $^{\circ}\text{C}$ )  $\geq$  0.

$T_T$ ,  $T_R$ , and  $\rho$  were set to  $2.8^{\circ}\text{C}$ ,  $13.0^{\circ}\text{C}$ , and  $0.3 \text{ g/cm}^3$ , respectively. We calculated the snow depth in December, January, February, and March. The highest snow depth of these months was used as the maximum snow depth. Snow depth of the previous month was set to 0 in December. Sea level at the LGM was assumed to be 120 m lower than at present<sup>22</sup>.

#### *Phylogenetic tree reconstruction for estimating the number of potential species*

We constructed the maximum likelihood (ML) phylogeny of all COI-II haplotypes using the likelihood ratchet method and Phylogears2 ver. 2.0<sup>35</sup> with TreeFinder, October version<sup>36</sup>. We used three constraints for the tree search following the phylogeny based on five gene sequences (Supplementary Figure S5): the sister relationship of *Oxelytrum discicolle* to all other silphine species, the sister relationship of *Diamesus* and *Necrodes*, and the monophyly



of *Necrodes* species. The confidence level at each node in the ML analysis was assessed by 100 bootstrap replicates without any constraints (Supplementary Figure S3).

We converted the ML tree, of which the outgroup species (*Nicrophorus quadripunctatus*) was pruned, into an ultrametric form using the penalized likelihood method<sup>38</sup> implemented in r8s ver. 1.7<sup>39</sup>. First, cross-validation was performed to select the appropriate smoothing parameter between 1 and 1000 (algorithm = TN). Second, a penalized likelihood search was conducted using the result of the cross-validation analysis (penalty = add, smoothing = 32). The time of the root node in the Silphinae was arbitrarily set to 100. Polytomies in the tree were randomly bifurcated using TreeEdit ver. 1.0a10<sup>87</sup>.

#### *Speciation and extinction rate in flight-capable and flightless lineages*

We constructed the ML phylogeny of Silphinae using the *COI-II*, *16S*, *28S*, *Wg*, and *Pepck* gene regions by a likelihood ratchet method and Phylogears2 ver. 2.0<sup>35</sup> with TreeFinder, October version<sup>36</sup>. The confidence level at each node in the ML analysis was assessed by 100 bootstrap replicates. Bayesian inference was also performed using MrBayes ver. 3.1<sup>88,89</sup> for the phylogenetic analysis with the same models of sequence evolution as in the ML analysis. Gaps were treated as a separate presence/absence character using simple indel coding<sup>90</sup>, and these coded gap characters (16S: 11 characters; 28S: 49 characters) were included in the Bayesian inference as restriction characters (coding = variable). The search was run for 2,000,000 generations and sampled every 100 generations. The first 5000 trees were discarded as burn-in. Trees constructed by ML and Bayesian inference showed the same topology and were congruent with the tree constructed in a previous study<sup>16</sup> (Supplementary

Figure S5).

We converted the ML tree, of which the outgroup species (*Nicrophorus quadripunctatus*) was pruned into an ultrametric form using a penalized likelihood method implemented in r8s. Cross-validation was performed to select the appropriate smoothing parameter between 1 and 10,000 (algorithm = TN), and a penalized likelihood search was performed using the result of the cross-validation analysis (penalty = add, smoothing = 10,000). The time of the root node in Silphinae was arbitrarily set to 100.

We calculated the speciation and extinction rates using a binary-state speciation and extinction (BiSSE) model<sup>44</sup>. The BiSSE model estimates the speciation and extinction rates in each binary state using a ML inference. In this analysis, we used genera of Silphinae as OTUs of a phylogenetic tree and assigned the numbers of nominal species and different character states (flight-capable, flightless, unknown) in each clade to each OTU. Silphinae comprises 12 genera and 109 species<sup>48,49</sup>. Of these, four genera were not available for the present phylogenetic analysis and were treated as follows in the BiSSE analysis. (1) The phylogenetic position of *Heterotemna* (3 species) was unknown, and hence it was excluded from the analysis; (2) *Heterosilpha* (2 species) was included in the *Necrophila* clade because these genera were sister groups in the previous molecular phylogenetic analysis<sup>91</sup>; the flight ability of *Heterosilpha* was set as unknown; (3) *Ptomaphila* (3 species) was included in the *Oxyletrum* clade because of their inferred sister-group relationship<sup>92,93</sup>. *Ptomaphila* was considered to be flight-capable based on its ecology<sup>92</sup>; (4) *Aclypea* (13 species) was included in the *Silpha* clade because *Aclypea* is considered to belong to the *Silpha* lineage<sup>91</sup>. *Aclypea* was treated as flightless based on its ecology<sup>94,95</sup>. In addition, we treated the single

dimorphic species (*Necrophila japonica*) as flight-capable because flight-capability has been maintained in this species and no speciation event had occurred after the evolution of dimorphism. The data set used for the BiSSE analysis contained 8 clades and 106 species, of which 36 were flightless, 68 were flight-capable, and 2 were of unknown flight-capability. Note that even when *Aclypea* was treated as of unknown flight-capability, the speciation rate was higher with the flightless state (0.269) than with the flight-capable state (0.091).

### Supplementary References

51. Zhang, A. B., Kubota, K., Takami, Y., Kim, J. L., Kim, J. K. & Sota, T. Species status and phylogeography of two closely related *Coptolabrus* species (Coleoptera: Carabidae) in South Korea inferred from mitochondrial and nuclear gene sequences. *Mol. Ecol.* **14**, 3823-3841 (2005).
52. Zhang, A. B., Kubota, K., Takami, Y., Kim, J. L., Kim, J. K. & Sota, T. Comparative phylogeography of three *Leptocarabus* ground beetle species in South Korea based on mitochondrial COI and nuclear 28S rRNA genes. *Zool. Sci.* **23**, 745-754 (2006).
53. Zeh, D. W., Zeh, J. A. & Bonilla, M. M. Phylogeography of the giant harlequin beetle (*Acrocinus longimanus*). *J. Biogeogr.* **30**, 747-753 (2003).
54. Shoda, E., Kubota, K. & Makihara, H. Geographical structuring of mitochondrial DNA in *Semanotus japonicus* (Coleoptera: Cerambycidae). *Appl. Entomol. Zool.* **38**, 339-345 (2003).
55. Sota, T. & Hayashi, M. Comparative historical biogeography of *Plateumaris* leaf beetles (Coleoptera: Chrysomelidae) in Japan: interplay between fossil and molecular data. *J. Biogeogr.* **34**, 977-993 (2007).
56. Kobayashi, N., Kumagai, M., Minegishi, D., Tamura, K., Aotsuka, T. & Katakura, H. Molecular population genetics of a host-associated sibling species complex of phytophagous ladybird beetles (Coleoptera: Coccinellidae: Epilachninae). *J. Zool. Sys. Evol. Res.* **49**, 16-24 (2011).
57. Toju, H. & Sota, T. Phylogeography and the geographical cline in the armament of a seed-predatory weevil: effects of historical events vs. natural selection from the host

- plant. *Mol. Ecol.* **15**, 4161-4173 (2006).
58. Ruiz E. A., Rinehart, J. E., Hayes, J. L. & Zúñiga, G. Effect of geographic isolation on genetic differentiation in *Dendroctonus pseudotsugae* (Coleoptera: Curculionidae). *Hereditas* **146**, 79-92 (2009).
59. Mock, K. E., Bentz, B. J., O'Neill, E. M., Chong, J. P., Orwin, N. J. & Pfrender, M. E. Landscape-scale genetic variation in a forest outbreak species, the mountain pine beetle (*Dendroctonus ponderosae*). *Mol. Ecol.* **16**, 553–568 (2007).
60. Downie, D. A. & Williams, J. G. Population Structure of *Porthetes hispidus* (Coleoptera: Curculionidae), a Pollinator of the African Cycad *Encephalartos friderici-guilielmi*. *Ann. Entomol. Soc. Am.* **102**, 1126-1134 (2009).
61. Kerdelhué, C., Roux-Morabito, G., Forichon, J., Chambon, J. –M., Robert, A. & Lieutier, F. Population genetic structure of *Tomicus piniperda* L. (Curculionidae: Scolytinae) on different pine species and validation of *T. destruens* (Woll.). *Mol. Ecol.* **11**, 483-494 (2002).
62. Horn, A., G. Roux-Morabito, G., Lieutier, F. & Kerdelhue, C. Phylogeographic structure and past history of the circum-Mediterranean species *Tomicus destruens* Woll. (Coleoptera: Scolytinae). *Mol. Ecol.* **15**, 1603–1615 (2006).
63. Ito, M. & Kajimura, H. Phylogeography of an ambrosia beetle, *Xylosandrus crassiusculus* (Motschulsky) (Coleoptera: Curculionidae: Scolytinae), in Japan. *Appl. Entomol. Zool.* **44**, 549-559 (2009).
64. Ito, M., Kajimura, H., Hamaguchi, K., Araya, K. & Lakatos, F. Genetic structure of Japanese populations of an ambrosia beetle, *Xylosandrus germanus* (Curculionidae:

- Scolytinae). *Entomol. Sci.* **11**, 375-383 (2008).
65. Kajtoch, Ł., Lachowska-Cierlik, D. & Mazur, M. Genetic diversity of the xerothermic weevils *Polydrusus inustus* and *Centricnemus leucogrammus* (Coleoptera: Curculionidae) in central Europe. *Eur. J. Entomol.* **106**, 325–334 (2009).
66. Abellán, P., Millán, A. & Ribera, I. Parallel habitat-driven differences in the phylogeographical structure of two independent lineages of Mediterranean saline water beetles. *Mol. Ecol.* **18**, 3885–3902 (2009).
67. Guzik, M. T., Cooper, S. J. B., Humphreys, W. F. & Austin, A. D. Fine-scale comparative phylogeography of a sympatric sister species triplet of subterranean diving beetles from a single calcrete aquifer in Western Australia. *Mol. Ecol.* **18**, 3683–3698 (2009).
68. Chatzimanolis, S. & Caterino, M. S. Phylogeography and conservation genetics of Californian coastal terrestrial communities: a comparative study using three beetles. *Insect. Conserv. Diver.* **1**, 222–232 (2008).
69. Marske, K. A., Leschen, R. A. B., Barker, G. M. & Buckley, T. R. Phylogeography and ecological niche modeling implicate coastal refugia and trans-alpine dispersal of a New Zealand fungus beetle. *Mol. Ecol.* **18**, 5126-5142 (2009).
70. Huang, Jen-Pan. & Lin, Chung-Ping. Diversification in subtropical mountains: Phylogeography, Pleistocene demographic expansion, and evolution of polyphenic mandibles in Taiwanese stag beetle, *Lucanus formosanus*. *Mol. Phyl. Evol.* **57**, 1149-1161 (2010).
71. Painter, J. N., Siitonen, J. & Hanski, I. Phylogeographical patterns and genetic diversity in three species of Eurasian boreal forest beetles. *Biol. J. Linn. Soc.* **91**, 267–279 (2007).

72. Miller, L. J. & Allsopp, P. G. Phylogeography of the scarab beetle *Antitrogus parvulus* Britton (Coleoptera: Scarabaeidae) in south-eastern Queensland, Australia. *Austral. J. Entomol.* **44**, 29–36 (2005).
73. Bell, K. L., Moritz, C., Moussalli, A. & Yeates, D. K. Comparative phylogeography and spaciation of dung beetles from the Australian Wet Tropics rainforest. *Mol. Ecol.* **16**, 4984-4998 (2007).
74. Chatzimanolis, S. & Caterino, M. S. Toward a better understanding of the “Transverse range break”: lineage diversification in southern California. *Evolution* **61**, 2127–2141 (2007).
75. Chatzimanolis, S. & Caterino, M. S. Phylogeography of the Darkling Beetle *Coelus ciliatus* in California. *Ann. Entomol. Soc. Am.* **101**, 939-949 (2008).
76. Contreras-Díaz, H. G., Moya, O., Oromí, P. & Juanp, C. Phylogeography of the endangered darkling beetle species of *Pimelia* endemic to Gran Canaria (Canary Islands). *Mol. Ecol.* **12**, 2131–2143 (2003).
77. Kurosawa, Y. Silphidae. in *The Coleoptera of Japan in color, Vol. 2*, S. Uéno, Y. Kurosawa, M. Satoh Eds. (Hoikusha, Osaka, 1985), pp. 247–251 (in Japanese).
78. Růžička, J & Schneider J. Silphidae. in *Catalogue of Palaearctic coleoptera, Vol. 2, I*. Löbl, A. Smetana Eds. (Appolo Books, Stenstrup, 2004), pp. 229–237.
79. Sota, T. & Hayashi, M. Molecular phylogenetic analysis of the genus *Donacia* (Coleoptera, Chrysomelidae) in Japan based on mitochondrial gene sequences. in *New developments in the biology of Chrysomelidae*, P. Jolivet, J. A. Santiago-Blay, M. Schmitt Eds. (SPB Academic Publishing, The Hague, 2004), pp. 105-116.

80. Simon, C. *et al.* Evolution weighting and phylogenetic utility of mitochondrial gene sequences and a compilation of conserved polymerase chain reaction primers. *Ann. Ent. Soc. Am.* **87**, 651-701 (1994).
81. Loxdale, H. D. & Lushai, G. Molecular markers in entomology. *Bull. Entomol. Res.* **88**, 577–600 (1998).
82. Japan Meteorological Agency, *Mesh climate data of Japan*, (Japan Metrological Business Support Center, Tokyo, 2002), (in Japanese; CD-ROM).
83. Elith, J. Quantitative methods from modeling species habitat: comparative performance and an application to Australian plants. in *Quantitative methods for conservation biology*, S. Ferson, M. Burgman Eds. (Springer, New York, 2002), pp. 39-58.
84. Ohta, T. Estimation of the water equivalent of snow cover in a mountainous region from precipitation and daily mean temperature. *Seppyo* **51**, 37-48 (1989).
85. Motoyama, H. Simulation of seasonal snowcover based on air temperature and precipitation. *J. Appl. Meteorol.* **29**, 1104-1110 (1990).
86. Kienzle, S. W. A new temperature based method to separate rain and snow. *Hydrol. Process.* **22**, 5067-5085 (2008).
87. Rambaut, A. & Charleston, M. *TREE EDIT version 1.0a10*, (University of Oxford, Evolutionary Biology Group, United Kingdom, 1999).
88. Huelsenbeck, J. P. & Ronquist, F. MRBAYES: Bayesian inference of phylogenetic trees. *Bioinformatics* **17**, 754-755 (2001).
89. Ronquist, F. & Huelsenbeck, J. P. MrBayes 3: Bayesian phylogenetic inference under mixed models. *Bioinformatics* **19**, 1572-1574 (2003).



90. Simmons, M. P. & Ochoterena, H. Gaps as characters in sequence-based phylogenetic analyses. *Syst. Biol.* **49**, 369-381 (2000).
91. Dobler, S. & Müller, J. K. Resolving phylogeny at the family level by mitochondrial cytochrome oxidase sequences: phylogeny of carrion beetles (Coleoptera, Silphidae). *Mol. Phylogen. Evol.* **15**, 390-402 (2000).
92. Peck, S. B. Review of the carrion beetles of Australia and New Guinea (Coleoptera: Silphidae). *Aust. J. Entomol.* **40**, 93-101 (2001).
93. Peck, S. B. & Anderson, R. S. Taxonomy, phylogeny and biogeography of the carrion beetles of Latin America (Coleoptera: Silphidae). *Quaest. Entomol.* **21**, 247-317 (1985).
94. Cooley, R. A. The spinach carrion beetle. *J. Economic Ent.* **10**, 94-102 (1917).
95. Anderson, R. S. & Peck, S. B. *The insects and arachnids of Canada part 13*. (Biosystematics Research Institute, Ottawa, 1985).
96. Aita, K. *et al.* The Coleoptera of the Ehime University Forest, V (Researches on the insect-fauna of Komenono University Forest, 9). *Bull. Ehime Univ. Forest* **33**, 65-77 (1995) (In Japanese with English title).
97. Aarii, K. Coleoptera. in *Insects of Tsukui-machi II. Research reports for the history of Tsukui-machi: Coleoptera*, Editorial Board of Tsukui-chôshi Ed (Sagamihara-shi, Sagamihara, 2008), pp. 54-92 (In Japanese).
98. Aarii, K. & Moriya, H. Coleoptera. in *Insects of Tsukui-machi I. Research reports for the history of Tsukui-machi: Coleoptera*, Editorial Board of Tsukui-chôshi Ed (Tsukui-machi, Nakano, 2004), pp. 7-113 (In Japanese).
99. Ejima, M. *et al.* A list of insects from Gotô Islands. in *The Biota of Gotô. A comparison*

- with Iki and Tsu-shima: A list of insects from Gotô Islands*, Nagasaki Biol. Soc. Ed (Nagasaki Biol. Soc., Nagasaki, 1981), pp. 247-332 (In Japanese).
100. Haga, K. The Coleoptera fauna of forest zone and alpine zone of Mt. Chiroro-dake, the Hidaka Mountain range, Hokkaido. *Bull. Higashi Taisetsu Mus. Nat. Hist.* **17**, 37-53 (1995) (In Japanese with English title and summary).
101. Haga, K. Beetles from Tsukuba-gakuentoshi and its vicinities. *Ruriboshi* **20**, 2-41 (1996) (In Japanese).
102. Haga, K. Beetles collected from 1970th to 1990th in Okutama, Tokyo. *Usubashiro* **35**, 1-46 (2007) (In Japanese).
103. Haga, K., Ito, K. & Shibata, K. The beetles collected by the mercury lamps for highway illumination in Kuroishi-daira, Kamishihoro Town. *Bull. Higashi Taisetsu Mus. Nat. Hist.* **28**, 39-58 (2006) (In Japanese with English title and summary).
104. Harusawa, K. Illustrated keys to the species of Japanese Necrodini (Coleoptera; Silphidae). *Nat. Insects* **37(5)**, 23-25 (2002) (In Japanese with English title).
105. Hayashi, Y. On the beetles associated to chicken baited trap in a foot of Mt. Amaishi-yama (1). *Nejirebane* **52**, 1-7 (1985) (In Japanese).
106. Hirano, Y. Beetles of Kanagawa Prefecture. in *Researches of the Insects of Kanagawa Prefecture. Fauna of Kanagawa Prefecture: Beetles of Kanagawa Prefecture*, Board of Education of Kanagawa Prefecture Ed (Board of Education of Kanagawa Prefecture, Yokohama, 1981), pp. 233-372 (In Japanese).
107. Hosoda, H. Altitudinal and seasonal occurrences of *Silpha longicornis* Portevin (Insecta: Coleoptera; Silphidae) at Mt. Kurobi, central Japan. *Nat. His. Bull. Ibaraki Univ.* **3**,

- 5-8 (1999).
108. Ichihashi, H., Kawahara, M., Maegawa, K. & Narukawa, N. Coleoptera fauna of Owase area (Mie, Japan). in *Reports of Research on the Fauna and Vegetation of Owase District in Mie Prefecture: Coleoptera fauna of Owase area (Mie, Japan)*, Reseach Group for Fauna and Vegetation of Owase District Ed (Reseach Group for Fauna and Vegetation of Owase District, 1982), (In Japanese with English title), pp. 505-547.
109. Imasaka, S. Notes on beetles from Shimabara Peninsula (1). *Trans. Nagasaki Biol. Soc.* **19**, 21-24 (1980) (In Japanese).
110. Ito, Y. Silphid beetles collected in Kochi Prefecture. *Gensei* **66**, 21-23 (1995) (In Japanese).
111. Kamimura, K., Nakane, T. & Koyama N. Seasonal and altitudinal distribution of beetles in Mt.Jonen, the Japan Alps,with descriptions of new species, I. *Sci. Rep. Kyoto Pref. Univ.* **15**, 17-38 (1964).
112. Katakura, H. & Fukuda, H. Faunal makeup of ground and carrion beetles in Kamiotoineppu, Hokkaido Nakagawa Experiment Forest, Northern Japan, with some notes on related problems. *Res. Bull. Hokkaido Univ. Forests* **32**, 75-92 (1975).
113. Katakura, H. & Ueno, R. A preliminary study on the faunal make-up and spatio-temporal distribution of carrion beetles (Coleoptera: Silphidae) on the Ishikari coast northern Japan. *Jpn. J. Ecol.* **35**, 461-468 (1985).
114. Katakura, H., Sonoda, M. & Yoshida, N. Carrion beetle (Coleoptera, Silphidae) fauna of Hokkaido University Tomakomai Experiment Forest, northern Japan, with a note on the habitat preference of a Geotrupine species, *Geotrupes laevistriatus* (Coleoptera,

- Scarabaeidae). *Res. Bull. Col. Exp. Forests* **43**, 43-56 (1986).
115. Kawakami, Y. & Tatsuzawa, S. A list of insects from Mage-shima Is. of Ôsumi Isls. *Nat. St.* **47**, 8 (2001) (In Japanese).
116. Kitamura, S. Collecting records of beetles from Toyama Prefecture. *Amica* **27**, 23-97 (1982) (In Japanese).
117. Koike, H. A list of the Silphidae from Niigata Prefecture. *Trans. Essa Ent. Soc.* **47**, 28-32 (1978) (In Japanese).
118. Kuranishi, R. B., Higashi, S., Sato, H. & Fukuda, H. Ground beetles on Mt. Usu six years after the 1977-78 eruptions. *Environ. Sci. Hokkaido*, **9(1)**, 69-78 (1986).
119. Kusakari, K. A preliminary study on *Silpha longicornis* Portevin. in *Insects of Kita Honshu, II. A preliminary study on Silpha longicornis Portevin*, B. Yamaya and K. Kusakari, Eds. (Bunanoki Shuppan, Yamagata, 1993), pp. 9-17 (In Japanese).
120. Kusama, K. & Ichikawa, K. Beetles of Hatsu-shima Is., Shizuoka Prefecture. *Shizuoka-no-Kôchû*, **1(2)**, 1-14 (1982) (In Japanese).
121. Kushida, T. Records of silphid beetles collected in Aomori Prefecture. *Celastrina* **28**, 45-46 (1993) (In Japanese).
122. Martin, S. Altitudinal distribution of burying beetles (Coleoptera, Silphidae) in the Southern Alps of Japan. *Jpn. J. Ent.* **57**, 876-879 (1989).
123. Matsuo, T. Distribution data of Coleopterorum from Hirado Is. 1. (Nagasaki Pref., Kyusyu). *Kita-Kyûshû-no-Konchû* **30**, 9-24 (1983) (In Japanese with English title).
124. Matsuzaki, M. Beetles collected on Amami-Ôshima Is. (1). *Kita-Kyûshû-no-Konchû* **35**, 41-42 (1988) (In Japanese).

125. Miyata, T. & Miyata, T. Collecting records of silphid beetles from Kochi Prefecture and Shikoku. *Gensei* **74**, 20-22 (1999) (In Japanese).
126. Mizuno, K. & Arata, Y. A list of beetles collected at Arata's residence in Takanodai, Maizuru, Kyoto, Japan. In *Regional Natural History of Coleoptera (1): A list of beetles collected at Arata's residence in Takanodai, Maizuru, Kyoto, Japan*, The Japan Coleopterological Society Ed (The Japan Coleopterological Society, Osaka, 2005) pp. 1-96, 8 pls. (In Japanese with English title).
127. Moriya, H. Beetles of Shiroyama-machi. Records from the Collection of Sagamihara City Museum. *Bull. Sagamihara City Mus.* **11**, 127-184 (2002) (In Japanese).
128. Nagahata, Y. Silphid beetles from Japan. Catalog of specimens deposited in Uesugi Museum (75). *Fauna in Oitama District*, **64**, 539-545 (1999) (In Japanese).
129. Nakao, S. Beetles associated to the lights of Yamakei Dam. *Kita-Kyûshû-no-Konchû* **30**, 52 (1983) (In Japanese).
130. Nakayama, H. *et al.* Insects of Suma-Hachibuse-yama. *Kyôsei-no-hiroba* **3**, 84-87 (2008) (In Japanese).
131. Nakayama, Y., Koda, K. & Nakamura, H. Burying beetles (Silphidae) fauna at Nishikoma Station Experimental Forest of AFC, Faculty of Shinshu University. *Bull. Shinshu Univ. AFC* **7**, 29-36 (2009).
132. Ogata, Y. A collecting record of *Oiceoptoma nigropunctata* Lewis. *Kita-Kyûshû-no-Konchû* **35**, 160 (1988) (In Japanese).
133. Ôhara, M. Notes on insect fauna of the Okusawa-Suigenchi area, Otaru, central Hokkaido, Japan, No. 3. Survey of the research in 1995-1996 and the records of

- Coleoptera. *Bull. Otaru Mus.* **10**, 35-41 (1997) (In Japanese with English title and abstract).
134. Ôhara, M., Yabuki, T. & Matsumoto, H. Notes on insect fauna of the Niseko Mountains, central Hokkaido, Japan, No. 1. Survey of the research and records of beetles. *Bull. Otaru Mus.* **10**, 97-110 (1997) (In Japanese with English title and abstract).
135. Ôhara, M., Mizota, K. & Maruyama, M. Notes on insect fauna of the Okusawa-Suigenchi area, Otaru, central Hokkaido, Japan, No. 12. Records of Coleoptera collected by Malaise trap in 1996. *Bull. Otaru Mus.* **12**, 25-42 (1999) (In Japanese with English title and abstract).
136. Okawa, H. Silphidae. in *Insects of Tochigi. Reports of the Investigation of the Natural Environment of Tochigi Prefecture: Silphidae*, Tochigi prefectural Office Ed (Tochigi prefectural Office, Utsunomiya, 2003), pp. 85-88. (In Japanese).
137. Okawa, H. Insects of Fujioka-machi. in *Nature of Fujioka-machi, History of Fujioka-machi, data part: Insects of Fujioka-machi*. Fujioka-machi Office Ed (Fujioka-machi Office, Fujioka, 2003), pp. 303-400, 4 pls. (In Japanese).
138. Omomo, S. Beetle collecting in Hokkaido. *Kita-Kyûshû-no-Konchû* **36**, 181-190 (1989) (In Japanese).
139. Růžička, J., Háva, J. & Schneider, J. Revision of Palaearctic and Oriental Oiceoptoma (Coleoptera; Silphidae). *Acta Soc. Zool. Bohem.* **68**, 30-51 (2004).
140. Sasaji, H. & Saito, M. in *a Catalog of Insects from Fukui Prefecture: Coleoptera*, Fukui Prefectural Office Ed (Fukui prefectural Office, Fukui, 1985), pp. 79-245 (In Japanese).

141. Sagamihara City Museum, *List of specimens of the Toru Kiryu Collection. Catalog of the Collection of Sagamihara City Museum* (Sagamihara City Museum, Sagamihara, 2001), pp. 199 (In Japanese).
142. Saito, M. Silphidae of Fukui Prefecture. *Coleopterists' News* **48**, 6-7 (1979) (In Japanese).
143. Saito, S., Haga, K., Hirano, Y., Mizunoya, S. & Suzuki, S. Report of the faunal investigation by Fukushima-mushi-no-kai in 1999 (Shimosato-machi in Minamiaizu-gun). *Fukushima-no-mushi* **18**, 5-26 (1999) (In Japanese).
144. Saito, S., Haga, K., Mizunoya, S., Maenami, T. & Yano, T. Report of the faunal survey of Insects on Mt. Ôtakine-yama and its adjacent areas, 2004 (first part). *InsecTohoku* **13**, 1-29 (2005) (In Japanese).
145. Sakamoto, Y., Kadosaki, A. & Watanabe, K. Note on Insect Fauna of Nopporo Forest Park, Hokkaido. III Coleoptera. *Memoirs Hist. Mus. Hokkaido* **11**, 43-80 (1976) (In Japanese with English title and summary).
146. Sasaki, S. A list of beetles associated to standing light traps in Oita Prefecture. *Nihô-no-mushi* **10**, 1-25 (1983) (In Japanese).
147. Sasaki, Y. Notes on insect fauna of Mt. Yôtei, central Hokkaido, Japan. Records of Coleoptera collected in 2000. *Bull. Otaru Mus.* **14**, 81-90 (2001) (In Japanese with English title and abstract).
148. Satô, M. in *Insects of Aichi Prefecture (first part), Beetles of Aichi Prefecture (I): Coleoptera of Aichi Prefecture*, Aichi prefectural Office Ed (Aichi prefectural Office, Nagoya, 1990), pp. 204-231 (In Japanese).

149. Shimoyama, K. A list of Silphid beetles from Aomori Prefecture. *Sayabane* **4**, 7-10 (1978) (In Japanese).
150. Shiyake, S. On the beetle fauna along the sandy beaches of Lake Biwa, with reference to maritime species. *Occ. Pap. Osaka Mus. Nat. Hist.* **2**, 181-194 (1997).
151. Sugiura, S. & Yamazaki, K. Outbreak of *Ivela auripes* (Lepidoptera, Lymantridae) and its arboreal predator *Dendoroxena sexcarinata* (Coleoptera, Silphidae). *Trans. Lepid. Soc. Jpn.* **58**, 40-42 (2007).
152. Takahashi, J. Silphidae and Catopidae of Hyogo Prefecture (Materials for coleopteran fauna in Hyogo Pref.). *Iratsume* **5**, 40-45 (1981) (In Japanese).
153. Takahashi, Y. Silphidae of Iwate Prefecture. *Celastrina* **28**, 29-44 (1993) (In Japanese).
154. Tanaka, K. Beetles of Yamaguchi Prefecture (2). Caraboidea, Histeroidea and Staphylinoidea. *Kita-Kyûshû-no-Konchû* **21**, 43-48 (1975) (In Japanese).
155. The Japan Coleopterological Society, in *Regional Natural History of Coleoptera (3): Beetles of Mt. Wasamata and its adjacent regions, Kii Peninsula, Central Japan*. The Japan Coleopterological Society Ed (The Japan Coleopterological Society, Osaka, 2007) pp. 1-117, 8 pls. (In Japanese with English title).
156. Toyoda, K. A study of beetle fauna in Ranzan-machi, Saitama Prefecture. *Yosegaki* **89**, 2583-2646 (1998) (In Japanese).
157. Yasuda, N. The vertical distribution of ground beetle communities in Mt. Apoi, Mts. Hidaka. *Kamikawa-chô-no-shizen* **19**, 79-90 (1997) (In Japanese with English title).
